# Supplementary material for: Age-dependent osteoprotective effects of hydroxytyrosol acetate: enhanced bone integrity via gut–bone axis activation
Source: Royal Society of Chemistry journal article supplement (doi:10.1039/d5fo02225h), 2025-12-15
Supplement: d5fo02225h1.pdf [file d5fo02225h1.pdf]

## Supplementary Information

Table 1. Key Resources

| REAGENT<br>or<br>RESOURCE                     | SOURCE                       | IDENTIFIER                                                 |
|-----------------------------------------------|------------------------------|------------------------------------------------------------|
| Chemicals, peptides, and recombinant proteins |                              |                                                            |
| Hydroxytyrosol acetate                        | Santa Cruz Biotech           | sc488930                                                   |
| Alizarin red S                                | Sigma-Aldrich                | A5533-25g                                                  |
| Nile Red                                      | Sigma-Aldrich                | N3013                                                      |
|                                               |                              |                                                            |
|                                               |                              |                                                            |
| Experimental models: Organisms/strains        |                              |                                                            |
| Mouse                                         | C57BL/6                      | Experimental Animal Center of Air Force Medical University |
|                                               |                              |                                                            |
| Critical commercial assays                    |                              |                                                            |
| ELISA kit                                     | mouse TNF- $\alpha$          | Shanghai Enzyme-linked Biotech, ml002095                   |
| ELISA kit                                     | mouse IL-6                   | Shanghai Enzyme-linked Biotech, ml063159                   |
| ELISA kit                                     | mouse CRP                    | Shanghai Enzyme-linked Biotech, ml064282                   |
| ELISA kit                                     | mouse ROS                    | Shanghai Enzyme-linked Biotech, ml009876                   |
| Oligonucleotides                              |                              |                                                            |
| m_ <i>Alpl</i> _F                             | 5'-GTTGCCAAGCTGGGAAGAACAC-3' | Sangon Biotech                                             |
| m_ <i>Alpl</i> _R                             | 5'-CCCACCCCGCTATTCCAAAC-3'   | Sangon Biotech                                             |
| m_ <i>Runx2</i> _F                            | 5'-CGCCCCTCCCTGAACTCT-3'     | Sangon Biotech                                             |
| m_ <i>Runx2</i> _R                            | 5'-TGCCTGCCTGGGATCTGTA-3'    | Sangon Biotech                                             |
| m_ <i>Sp7</i> _F                              | 5'-TCCCTGGATATGACTCATCCCT-3' | Sangon Biotech                                             |
| m_ <i>Sp7</i> _R                              | 5'-CCAAGGAGTAGGTGTGTTGCC-3'  | Sangon Biotech                                             |
| m_ <i>Pparg</i> _F                            | 5'-AAGAGCTGACCCAATGGTTG-3'   | Sangon Biotech                                             |
| m_ <i>Pparg</i> _R                            | 5'-ACCCTTGCATCCTTCACAAG-3'   | Sangon Biotech                                             |

| REAGENT<br>RESOURCE                     | or<br>SOURCE                                     | IDENTIFIER                                   |
|-----------------------------------------|--------------------------------------------------|----------------------------------------------|
| m_ <i>Cebpa</i> _F                      | 5'-ACCGGGTTTCGGGACTTGA-3'                        | Sangon Biotech                               |
| m_ <i>Cebpa</i> _R                      | 5'-CCCGCAGGAACATCTTTAAGTGA-3'                    | Sangon Biotech                               |
| m_ <i>Lpl</i> _F                        | 5'-AACACAACCAGGCCTTCGAGA-3'                      | Sangon Biotech                               |
| m_ <i>Lpl</i> _R                        | 5'-CCGATGTCCACCTCCGTGTA-3'                       | Sangon Biotech                               |
| m_ <i>Gapdh</i> _F                      | 5'-TGCACCACCAACTGCTTAG-3'                        | Sangon Biotech                               |
| m_ <i>Gapdh</i> _R                      | 5'-GGATGCAGGGATGATGTTC-3'                        | Sangon Biotech                               |
| Software and algorithms                 |                                                  |                                              |
| AODB                                    | South China University of Technology             | idrugLab                                     |
| Metascape                               | Metascape Foundation                             | N/A                                          |
| PubChem,<br>PubMed, GEO,<br>Gene, BLAST | National Center for Biotechnology<br>Information | N/A                                          |
| UniProt                                 | EMBL-EBI, SIB, PIR                               | N/A                                          |
| SwissADME,<br>SwissTargetPredict<br>ion | Swiss Institute of Bioinformatics                | Molecular Modeling Group                     |
| Coconut                                 | Friedrich Schiller University Jena               | Steinbeck-Lab                                |
| SEA                                     | University of California San Francisco           | Shoichet Lab                                 |
| Super-PRED                              | Charité-University Medicine Berlin               | Structural Bioinformatics<br>Group           |
| TargetNet                               | Central South University                         | Computational Biology &<br>Drug Design Group |
| R                                       | R Development Core Team                          | 4.3.2                                        |
| Rstudio                                 | Posit Software                                   | 2024.12.1+563                                |
| phyloseq                                | Stanford University                              | Paul J. McMurdie                             |
| car                                     | John Fox, et al.                                 | 3.1-3                                        |
| emmeans                                 | Russell V. Lenth, et al.                         | 1.11.2-8                                     |
| effectsize                              | Mattan S. Ben-Shachar, et al.                    | 1.0.1                                        |
| outliers                                | Lukasz Komsta                                    | 0.15                                         |

| REAGENT<br>RESOURCE | or<br>SOURCE                                  | IDENTIFIER         |
|---------------------|-----------------------------------------------|--------------------|
| ggplot2             | Hadley Wickham, et al.                        | 4.0.0              |
| STAMP               | The University of Queensland                  | Donovan H Parks    |
| MetaboAnalyst 6.0   | McGill University                             | XiaLab             |
| GMrepo v2           | Huazhong University of Science and Technology | Wei-Hua Chen group |
| Image-Pro Plus      | Media Cybernetics                             | 6.0                |
| Excel               | Microsoft                                     | 2501               |
| Graphpad Prism      | GraphPad Software                             | 10.1.2(324)        |
| Origin              | OriginLab                                     | 10.2.0.188         |
| Mimics              | Materialise NV                                | 21.0.0.406         |
| Abaqus              | Dassault Systemes Simulia Corp.               | 2023               |
| Photoshop           | Adobe                                         | 24.5               |
| Illustrator         | Adobe                                         | 27.5               |

## Supplementary Figures

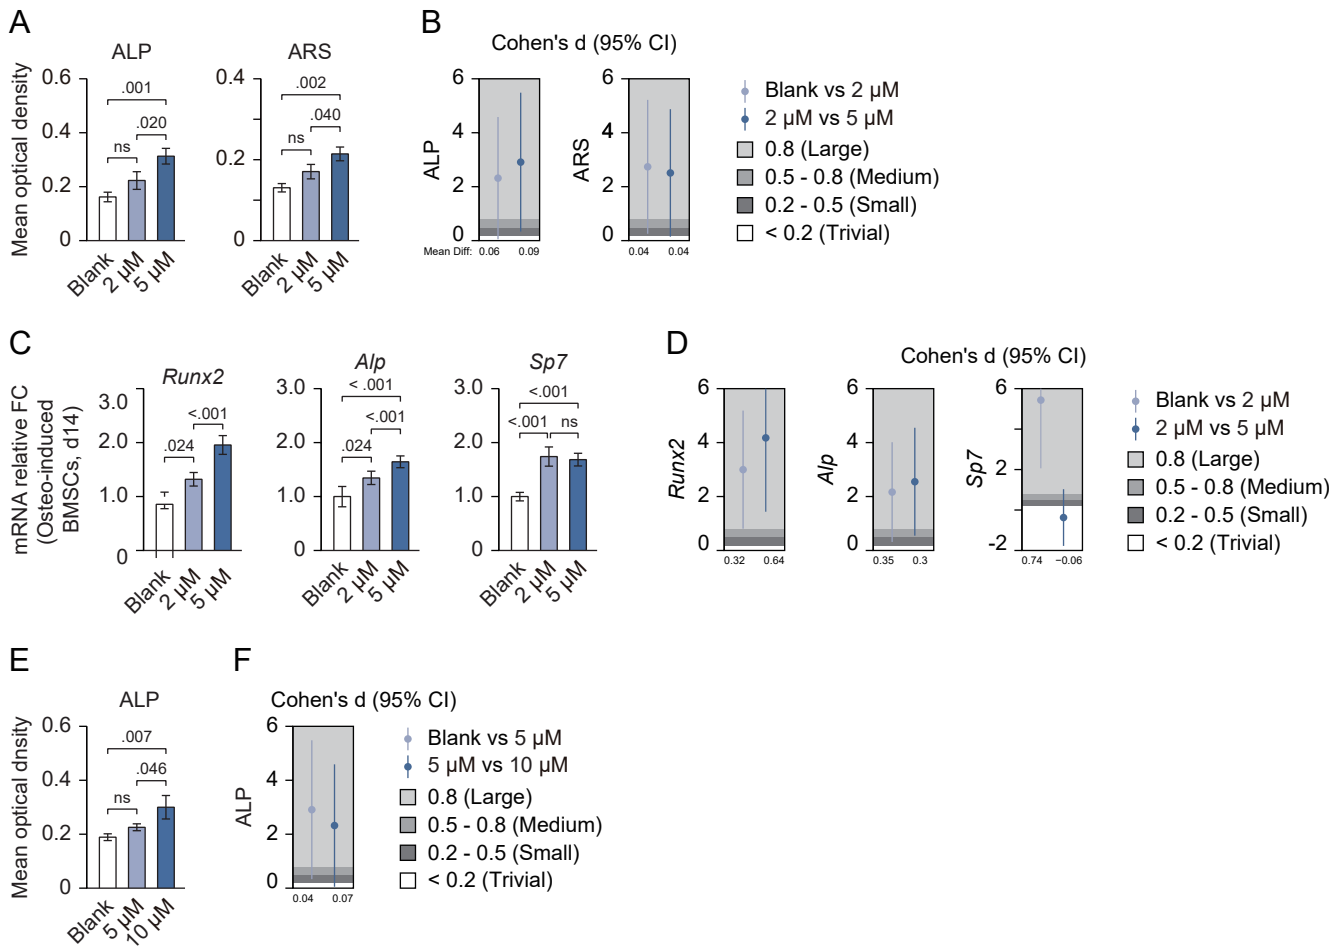

Fig. S1. The effect of HT-ac on osteogenic differentiation of BMSCs and MC3T3-E1 osteoblasts in vitro. (A) Mean optical density of BMSCs after ALP (Alkaline Phosphatase) and ARS (Alizarin Red S) staining. (B) Estimation of effect size for panel A. (C) RT-qPCR analysis of osteogenic genes expression (normalized to Gapdh). (D) Estimation of effect size for panel C. (E) Mean optical density of MC3T3-E1 osteoblasts after ALP (Alkaline Phosphatase) staining. (F) Estimation of effect size for panel E. Statistical significance was determined via One-way ANOVA followed by Bonferroni-corrected post-hoc pairwise comparisons; adj.*p* (denoted as corrected *p*-value in the figure) < 0.05 was considered statistically significant. Effect size (Cohen's *d*) was compared between adjacent groups, and is classified as Large ( $\geq 0.8$ ), Medium (0.5 - 0.8), Small (0.2 - 0.5), or Trivial (< 0.2).

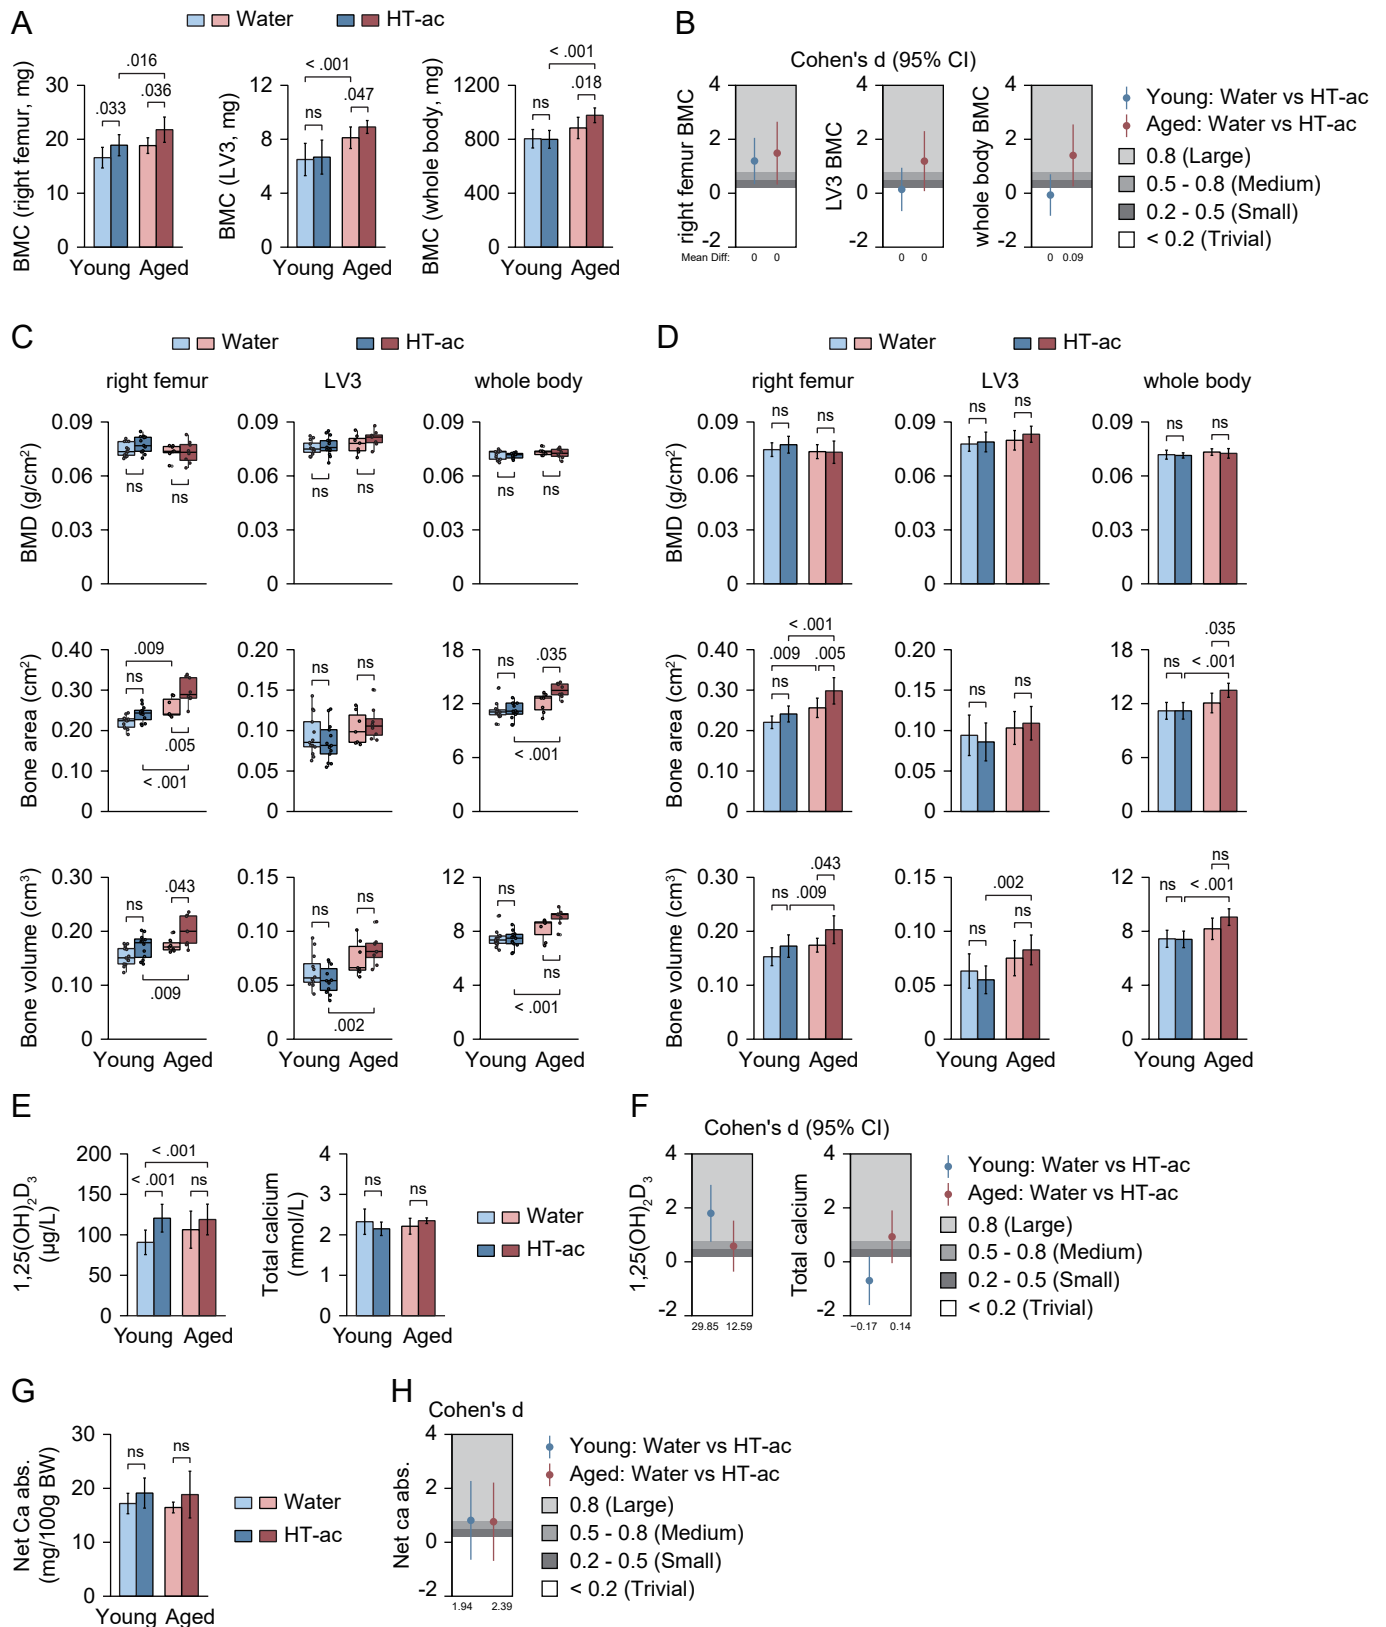

Fig. S2. The effects of HT-ac supplementation on bone properties – DEXA results. (A) Bone mineral content (BMC) of key sites in bar plots. (B) Estimation of effect size for panel A. (C-D) Bone mineral density (BMD), bone area and bone volume of right femur, third lumbar vertebra and whole body, respectively; box plots and bar plots (mean  $\pm$  SD) are presented simultaneously. (E) Levels of serological factors in bar plots. (F) Estimation of effect size for panel E. (G) Net calcium absorption in bar plots. (H) Estimation of effect size for panel G. Statistical significance was determined via Two-way ANOVA followed by Bonferroni-corrected post-hoc pairwise comparisons; adj.*p* (denoted as corrected *p*-value in the figure) < 0.05 was considered statistically significant. Effect size (Cohen's *d*) was compared between adjacent groups, and is classified as Large ( $\geq 0.8$ ), Medium (0.5 - 0.8), Small (0.2 - 0.5), or Trivial (< 0.2).



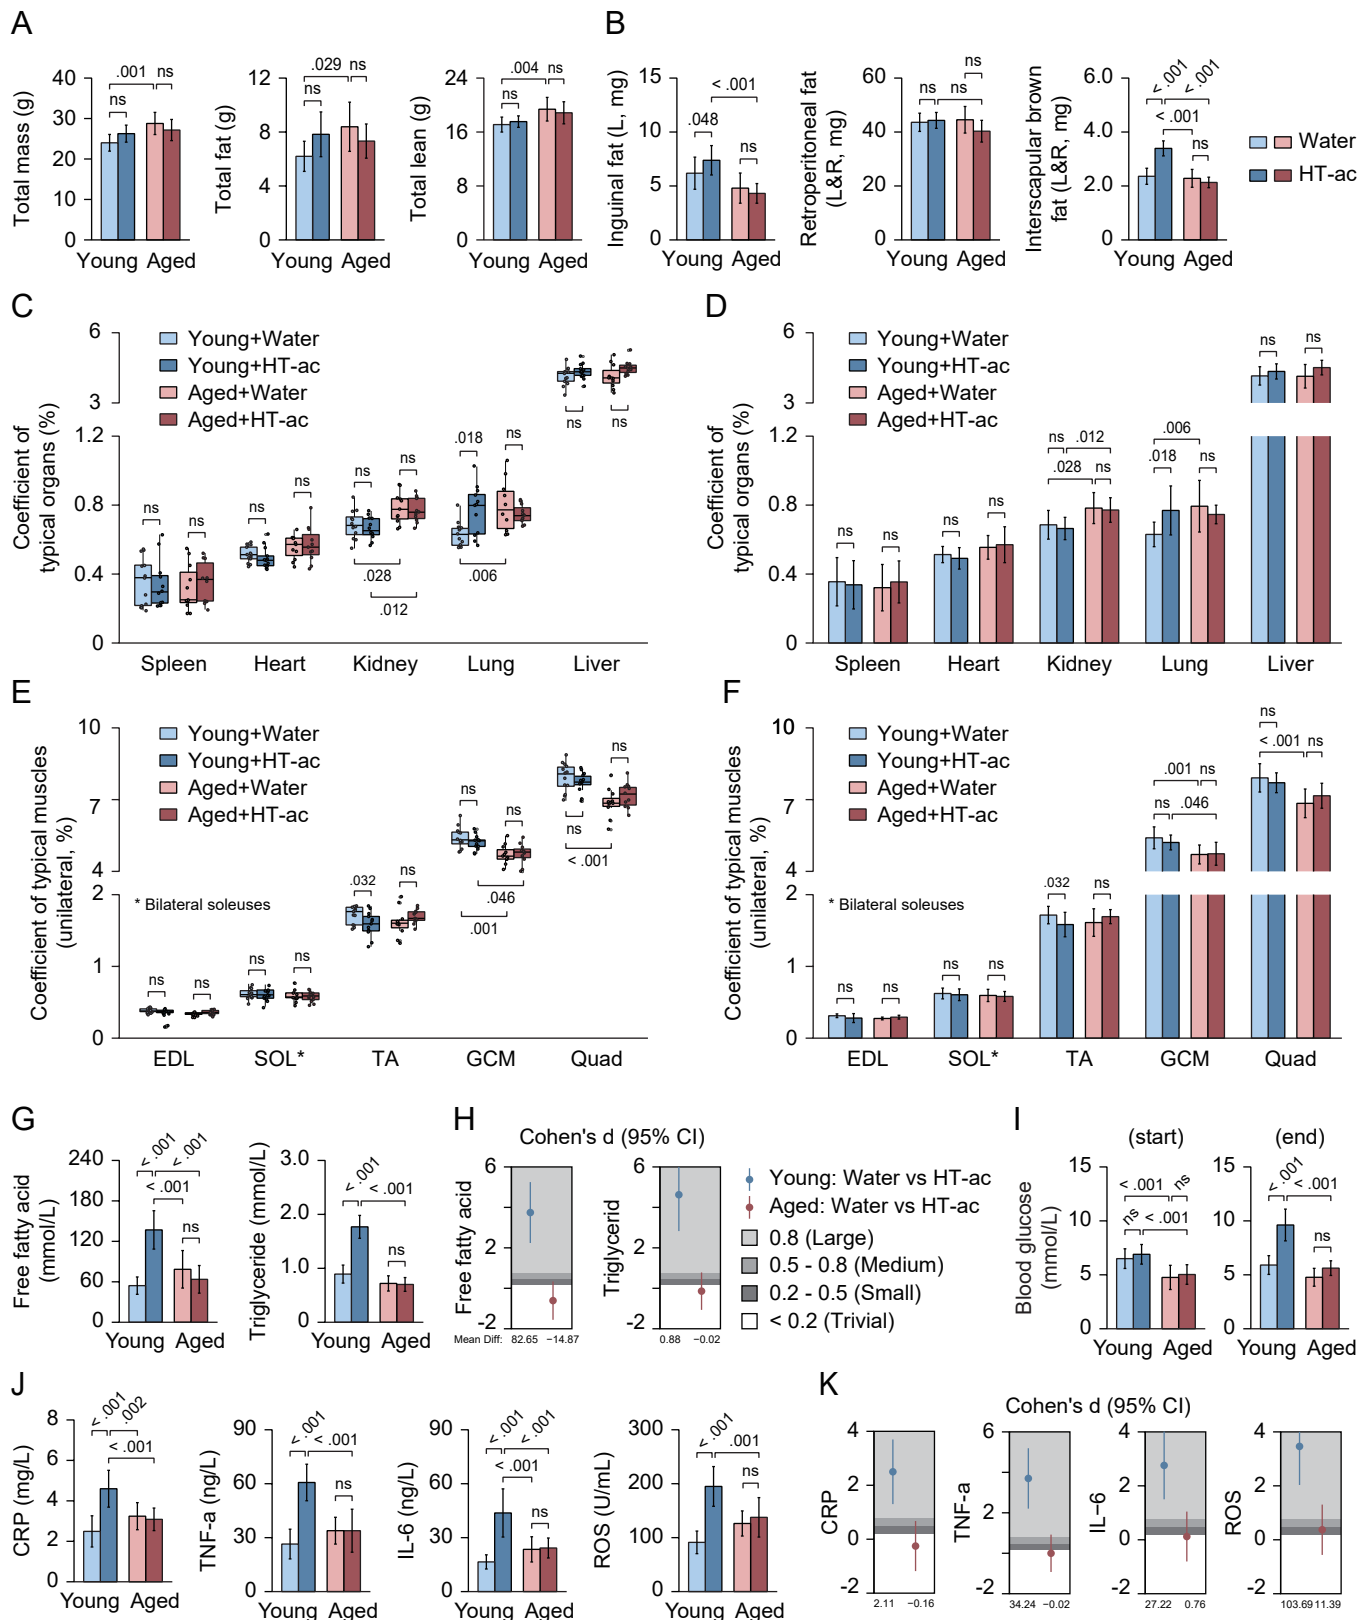

Fig. S4. The effects of HT-ac supplementation on the weight of typical organs and muscle tissues. (A) DEXA-derived indices related to whole body fat and lean. (B) Weights of different adipose tissue at autopsy (mean ± SD). (C-F) Coefficient of typical organs and muscles after the gavage treatment, box plots and bar plots (mean ± SD) are presented simultaneously. (G) Serological factors related to lipid metabolism. (H) Estimation of effect size for panel G. (I) Fasting blood glucose before and after gavage. (J) Serological factors related to inflammation. CRP, C-reactive protein; ROS, reactive oxygen species. (K) Estimation of effect size for panel J. Statistical significance was determined via Two-way ANOVA followed by Bonferroni-corrected post-hoc pairwise comparisons; adj.*p* (denoted as corrected *p*-value in the figure) < 0.05 was considered statistically significant. Effect size (Cohen's *d*) was compared between adjacent groups, and is classified as Large (≥ 0.8), Medium (0.5 - 0.8), Small (0.2 - 0.5), or Trivial (< 0.2).

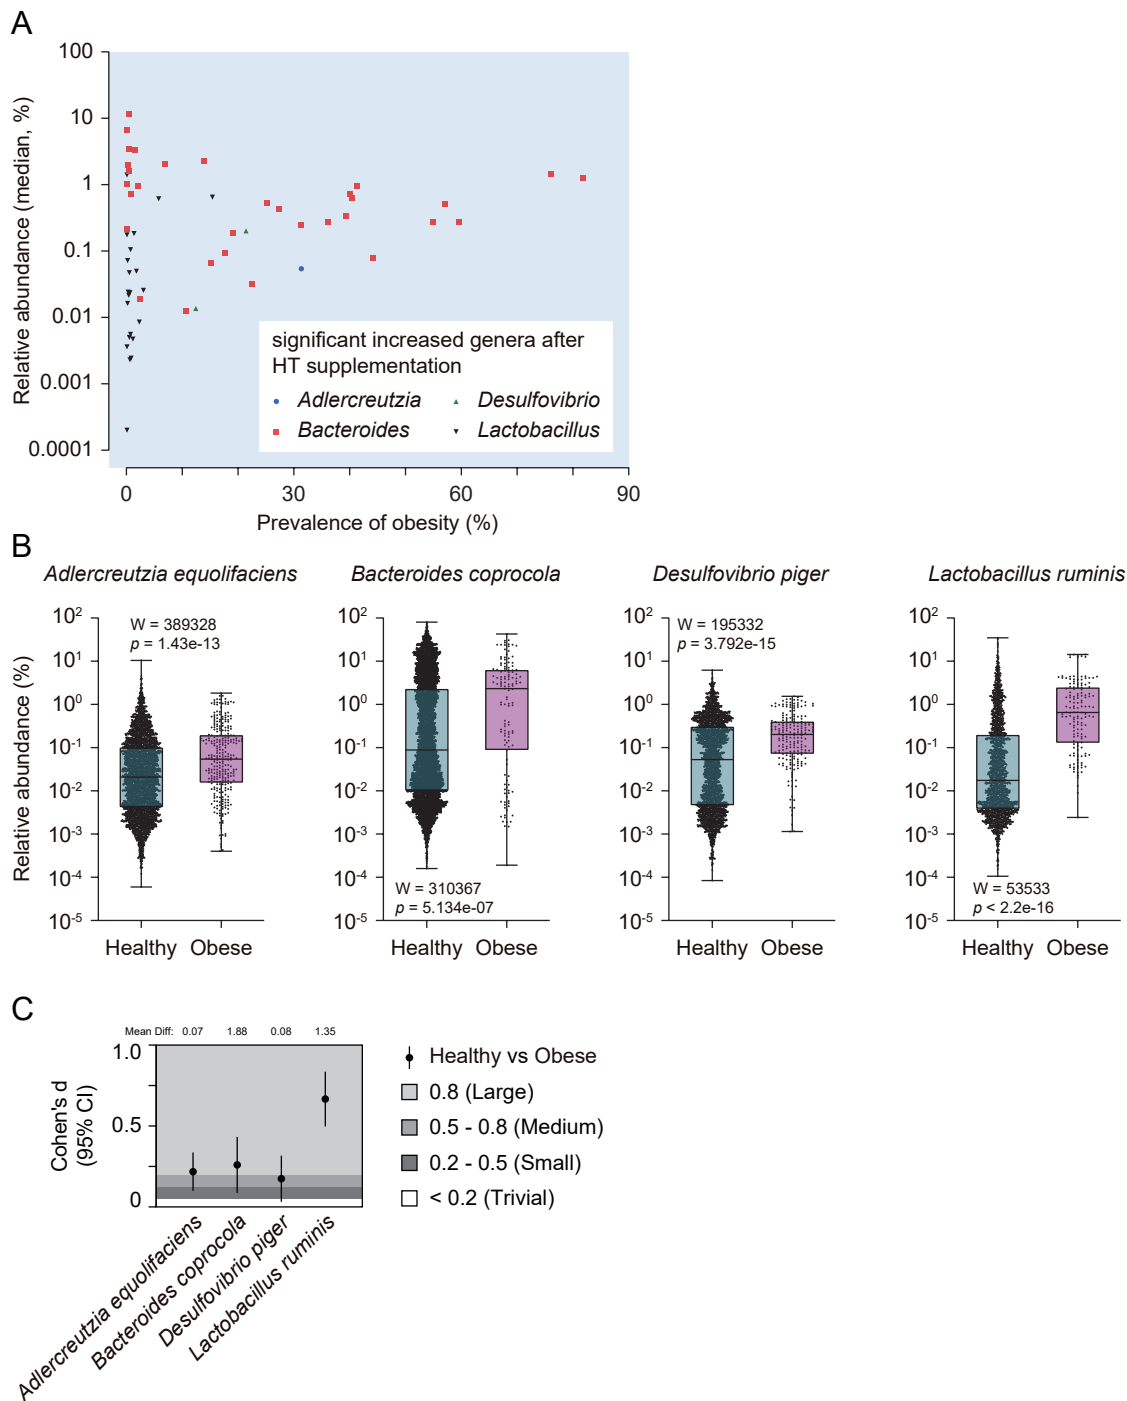

Fig. S5. HT supplementation increased the abundance of gut microbiota associated with obesity. (A) Correlation between the prevalence of obesity and the relative abundance of specific bacterial species that showed a significant increase after HT supplementation. Each point represents a species under the specified genus. (B) Relative abundance of representative species of the specific genus in obese individuals. (C) Estimation of effect size for panel B. Effect size (Cohen's d) was compared between Healthy and Obese group, and is classified as Large ( $\geq 0.8$ ), Medium (0.5 - 0.8), Small (0.2 - 0.5), or Trivial ( $< 0.2$ ). Differences between two groups were evaluated using the Mann–Whitney U test.
